# Supplementary material for: A novel strategy of profiling the mechanism of herbal medicines by combining network pharmacology with plasma concentration determination and affinity constant measurement
Source: Royal Society of Chemistry journal article supplement (doi:10.1039/c6mb00500d), 2016-08-08
Supplement: c6mb00500d1.pdf [file c6mb00500d1.pdf]

## Supplementary Information

**Table S1** The ingredients in Kushen and their molecule formulas.

| Compound Name                                      | Molecule formula                                              |
|----------------------------------------------------|---------------------------------------------------------------|
| Formononetin                                       | C <sub>16</sub> H <sub>12</sub> O <sub>4</sub>                |
| 2'-methoxykurarinone                               | C <sub>27</sub> H <sub>32</sub> O <sub>6</sub>                |
| 2-n-tricosyl-5,7-dihydroxy-6,8-dimethyl chromone   | C <sub>34</sub> H <sub>56</sub> O <sub>4</sub>                |
| 2-n-pentacosyl-5,7-dihydroxy-6,8-dimethyl chromone | C <sub>36</sub> H <sub>60</sub> O <sub>4</sub>                |
| 2-n-hencosyl-5,7-dihydroxy-6,8-dimethylchromone    | C <sub>32</sub> H <sub>52</sub> O <sub>4</sub>                |
| 2-n-nonadecyl-5,7-dihydroxy-6,8-dimethyl chromone  | C <sub>30</sub> H <sub>48</sub> O <sub>4</sub>                |
| 2-n-heptadecyl-5,7-dihydroxy-6,8-dimethyl chromone | C <sub>28</sub> H <sub>44</sub> O <sub>4</sub>                |
| 2-n-tridecyl-5,7-dihydroxy-6,8-dimethyl chromone   | C <sub>24</sub> H <sub>36</sub> O <sub>4</sub>                |
| 2-n-pentadecyl-5,7-dihydroxy-6,8-dimethyl chromone | C <sub>26</sub> H <sub>40</sub> O <sub>4</sub>                |
| Maackiain                                          | C <sub>16</sub> H <sub>12</sub> O <sub>5</sub>                |
| 6,8-di(3,3-dimethylallyl)genistein                 | C <sub>23</sub> H <sub>24</sub> O <sub>4</sub>                |
| Kushequinone A                                     | C <sub>17</sub> H <sub>22</sub> O <sub>4</sub>                |
| 13,14-dehydrosophoridine                           | C <sub>15</sub> H <sub>22</sub> N <sub>2</sub> O              |
| Sophocarpine                                       | C <sub>15</sub> H <sub>22</sub> N <sub>2</sub> O              |
| 9 $\alpha$ -hydroxysophoramine                     | C <sub>15</sub> H <sub>20</sub> N <sub>2</sub> O <sub>2</sub> |
| Matrine                                            | C <sub>15</sub> H <sub>24</sub> N <sub>2</sub> O              |
| Sophoranol                                         | C <sub>15</sub> H <sub>24</sub> N <sub>2</sub> O <sub>2</sub> |
| Isosophocarpine                                    | C <sub>15</sub> H <sub>22</sub> N <sub>2</sub> O              |
| Sophoridine                                        | C <sub>15</sub> H <sub>24</sub> N <sub>2</sub> O              |
| Lehmannine                                         | C <sub>15</sub> H <sub>22</sub> N <sub>2</sub> O              |
| Isoxanthohumol                                     | C <sub>21</sub> H <sub>22</sub> O <sub>5</sub>                |
| Kuraridin                                          | C <sub>26</sub> H <sub>30</sub> O <sub>6</sub>                |
| $\Delta$ 7-dehydrosophoramine                      | C <sub>15</sub> H <sub>18</sub> N <sub>2</sub> O              |
| Soyasaponin I                                      | C <sub>48</sub> H <sub>78</sub> O <sub>18</sub>               |
| Mamanine                                           | C <sub>15</sub> H <sub>22</sub> N <sub>2</sub> O <sub>2</sub> |
| Lupanine                                           | C <sub>15</sub> H <sub>24</sub> N <sub>2</sub> O              |

|                                          |                      |
|------------------------------------------|----------------------|
| Norkurarinol                             | $C_{25}H_{30}O_7$    |
| Kuraranine                               | $C_{12}H_{18}N_2O_2$ |
| Isokuraramine                            | $C_{12}H_{18}N_2O_2$ |
| Sophoraflavanone G                       | $C_{25}H_{28}O_6$    |
| 7,11-dehydromatrine                      | $C_{15}H_{22}N_2O$   |
| Sophoramine                              | $C_{15}H_{20}N_2O$   |
| 9 $\alpha$ -hydroxymatrine               | $C_{15}H_{24}N_2O_2$ |
| 5 $\alpha$ ,9 $\alpha$ -dihydroxymatrine | $C_{15}H_{24}N_2O_3$ |
| Norkurarinone                            | $C_{25}H_{28}O_6$    |
| Biochanin A                              | $C_{16}H_{12}O_5$    |
| Kuraridinol                              | $C_{26}H_{32}O_7$    |
| N-allomatrine                            | $C_{15}H_{24}N_2O$   |
| Anagyrine                                | $C_{15}H_{20}N_2O$   |
| Trifolirhizin                            | $C_{22}H_{22}O_{10}$ |
| Kurarinone                               | $C_{26}H_{30}O_6$    |
| Vkushenol A                              | $C_{25}H_{28}O_5$    |
| Kushenol B                               | $C_{30}H_{36}O_6$    |
| Vkushenol C                              | $C_{25}H_{28}O_6$    |
| Kushenol D                               | $C_{27}H_{32}O_6$    |
| Kushenol E                               | $C_{25}H_{28}O_6$    |
| Kushenol F                               | $C_{25}H_{28}O_6$    |
| Kushenol G                               | $C_{25}H_{28}O_8$    |
| Kushenol H                               | $C_{26}H_{32}O_8$    |
| Vkushenol I                              | $C_{26}H_{28}O_7$    |
| Kushenol J                               | $C_{27}H_{32}O_{14}$ |
| Xanthohumol                              | $C_{21}H_{22}O_5$    |
| Vkushenol L                              | $C_{25}H_{28}O_7$    |
| Kushenol M                               | $C_{30}H_{36}O_7$    |
| Kushenol N                               | $C_{26}H_{30}O_7$    |

|                                         |                      |
|-----------------------------------------|----------------------|
| Kushenol O                              | $C_{27}H_{30}O_{13}$ |
| Sophoraflavoside I                      | $C_{59}H_{96}O_{27}$ |
| Sophoraflavoside II                     | $C_{48}H_{76}O_{20}$ |
| Sophoraflavoside III                    | $C_{53}H_{84}O_{24}$ |
| Sophoraflavoside IV                     | $C_{59}H_{94}O_{29}$ |
| Kurarinol                               | $C_{26}H_{32}O_7$    |
| Oxymatrine                              | $C_{15}H_{24}N_2O_2$ |
| luteolin-7-O-glucoside                  | $C_{21}H_{20}O_{11}$ |
| Cinaroside                              | $C_{21}H_{20}O_{11}$ |
| Oxysophocarpine                         | $C_{15}H_{22}N_2O_2$ |
| Trifolirhizin-6"-O-malonate             | $C_{25}H_{24}O_{13}$ |
| Sophoranol N-oxide                      | $C_{15}H_{24}N_2O_3$ |
| N-oxysophocarpine                       | $C_{15}H_{22}N_2O_2$ |
| 8-prenylkaempferol                      | $C_{20}H_{18}O_6$    |
| 9 $\alpha$ -hydroxysophocarpine         | $C_{15}H_{22}N_2O_2$ |
| 9 $\alpha$ -hydroxysophocarpine N-oxide | $C_{15}H_{22}N_2O_3$ |
| Methylkushenol C                        | $C_{26}H_{28}O_7$    |
| Kushenol K                              | $C_{26}H_{32}O_8$    |
| Rhombifoline                            | $C_{15}H_{20}N_2O$   |
| Isokurarinone                           | $C_{26}H_{30}O_6$    |
| Baptifolin                              | $C_{15}H_{20}N_2O_2$ |
| Isomatrine                              | $C_{15}H_{24}N_2O$   |
| Isoanhydroicaritin                      | $C_{21}H_{22}O_6$    |

---



**Table S2** The detecting parameters for ingredients towards PPAR $\gamma$  through SPR assay.

| <b>ID</b> | <b>Name</b>     | <b>KD (<math>\mu</math>M)</b> | <b>Rmax</b> | <b>offset</b> | <b>Chi<sup>2</sup></b> |
|-----------|-----------------|-------------------------------|-------------|---------------|------------------------|
| C6        | Matrine         | 15.34                         | 4.913       | -1.540        | 0.481                  |
| C28       | Oxymatrine      | 27.24                         | 17.71       | -2.887        | 0.717                  |
| C29       | Oxysophocarpine | 80.90                         | 25.83       | -3.803        | 1.71                   |
| C2        | Maackiain       | 3.094                         | 12.06       | -7.955        | 0.846                  |
| C25       | Trifolirhizin   | 190.8                         | 35.72       | -0.4447       | 0.943                  |
| C1        | Formononetin    | 181.8                         | 45.62       | 1.480         | 0.0175                 |
| C22       | Biochanin A     | 52.90                         | 20.82       | -4.199        | 1.09                   |
| C11       | Isoxanthohumol  | 31.49                         | 11.60       | -2.687        | 2.37                   |

**Table S3** The detecting parameters for ingredients towards ER through SPR assay.

| <b>ID</b> | <b>Name</b>     | <b>KD (<math>\mu</math>M)</b> | <b>Rmax</b> | <b>offset</b> | <b>Chi<sup>2</sup></b> |
|-----------|-----------------|-------------------------------|-------------|---------------|------------------------|
| C6        | Matrine         | 10.28                         | 25.40       | -15.52        | 1.55                   |
| C28       | Oxymatrine      | 44.93                         | 5.929       | -4.595        | 0.0216                 |
| C5        | Sophocarpine    | 113.1                         | 32.47       | -5.776        | 0.826                  |
| C29       | Oxysophocarpine | 28.08                         | 8.191       | -1.598        | 0.598                  |
| C2        | Maackiain       | 116.6                         | 87.79       | -1.614        | 0.782                  |
| C1        | Formononetin    | 97.95                         | 49.48       | -5.138        | 0.296                  |
| C22       | Biochanin A     | 61.36                         | 54.48       | -14.84        | 2.56                   |

**Table S4** The detecting parameters for ingredients towards CA2 through SPR assay.

| <b>ID</b> | <b>Name</b>   | <b>KD (<math>\mu</math>M)</b> | <b>Rmax</b> | <b>offset</b> | <b>Chi<sup>2</sup></b> |
|-----------|---------------|-------------------------------|-------------|---------------|------------------------|
| C6        | Matrine       | 155.2                         | 11.26       | 1.605         | 0.120                  |
| C5        | Sophocarpine  | 93.87                         | 19.37       | -0.7353       | 15.4                   |
| C2        | Maackiain     | 22.44                         | 27.96       | -3.936        | 1.97                   |
| C25       | Trifolirhizin | 164.2                         | 53.11       | -3.434        | 7.36                   |
| C1        | Formononetin  | 85.84                         | 30.23       | -3.655        | 4.40                   |
| C22       | Biochanin A   | 57.47                         | 31.09       | -8.904        | 0.743                  |

**Table S5** The detecting parameters for ingredients towards p53 through SPR assay.

| <b>ID</b> | <b>Name</b>     | <b>KD (<math>\mu</math>M)</b> | <b>Rmax</b> | <b>offset</b> | <b>Chi<sup>2</sup></b> |
|-----------|-----------------|-------------------------------|-------------|---------------|------------------------|
| C5        | Sophocarpine    | 1.007                         | 34.09       | -33.20        | 0.0885                 |
| C29       | Oxysophocarpine | 3.241                         | 14.96       | -12.27        | 0.157                  |
| C2        | Maackiain       | 69.97                         | 33.24       | -4.772        | 2.20                   |
| C22       | Biochanin A     | 30.38                         | 52.88       | -9.324        | 0.641                  |
| C11       | Isoxanthohumol  | 8.517                         | 59.67       | -28.98        | 0.252                  |

**Table S6** The detecting parameters for ingredients towards MIF through SPR assay.

| <b>ID</b> | <b>Name</b>   | <b>KD (<math>\mu</math>M)</b> | <b>Rmax</b> | <b>offset</b> | <b>Chi<sup>2</sup></b> |
|-----------|---------------|-------------------------------|-------------|---------------|------------------------|
| C6        | Matrine       | 67.29                         | 7.114       | -0.7330       | 0.313                  |
| C2        | Maackiain     | 56.02                         | 14.90       | 3.387         | 0.0833                 |
| C25       | Trifolirhizin | 84.88                         | 32.62       | -8.980        | 2.33                   |
| C1        | Formononetin  | 2.069                         | 44.78       | -35.07        | 0.709                  |
| C22       | Biochanin A   | 89.94                         | 49.98       | -6.461        | 2.66                   |
